# Supplementary material
Source: publisher site journal article supplement (https://www.dovepress.com/get_supplementary_file.php?f=342426.docx)
Supplement: Supplementary file 1 [file get_supplementary_file.php]

**Supplementary materials**

Table S1: Mean ranks of variables having violated normality assumptions**.**

| Variables | Categories | N | Mean Rank | Chi-square | df | p-value |
| --- | --- | --- | --- | --- | --- | --- |
| Work experience | ≤ 5 | 208 | 247.05 |  | 3 |  |
| 6-10 | 173 | 261.00 |  |  |  |
| 11-15 | 90 | 260.27 |  |  |  |
| >15 | 45 | 293.33 |  |  |  |
| Total | 516 |  | 3.699 | 3 | .296 |
| type of translator used (n=274) | Family | 162 | 135.46 |  |  |  |
| Colleague | 70 | 143.93 |  |  |  |
| medical translator | 27 | 136.54 |  |  |  |
| Others | 15 | 131.23 |  |  |  |
| Total | 274 |  | .666 | 3 | .881 |
| Role of nurse | Matron | 3 | 190.67 |  |  |  |
| Supervisor | 12 | 185.13 |  |  |  |
| head nurse | 26 | 299.42 |  |  |  |
| staff nurse | 475 | 258.54 |  |  |  |
| Total | 516 |  | 5.486 | 3 | .139 |
| Age of participants | 20 to 30 year | 290 | 244.47 |  |  |  |
| 31 to 40 years | 193 | 276.77 |  |  |  |
| 41 to 50 years | 31 | 263.63 |  |  |  |
| 51 and above | 2 | 450.50 |  |  |  |
| Total | 516 |  | 8.819 | 3 | .032 |

Table S2: Main-themes and sub-themes of participants Amhara Region selected Referral Hospitals, Ethiopia, 2021 (n=10).

| Theme | Subtheme |
| --- | --- |
| Language barriers | Lack of interpreter  Different languages and dialects |
| Organizational barriers | Not allowed the cultural practice  Lack of provision of culture-based care |
| Cultural difference | Refusing medical care  Need to practice cultural activities |
| Health care providers factor | Lack of awareness  Negligence  Lack of training |
